# Supplementary material for: Hydronium ion and water complexes vs. methanol on solid catalyst surfaces: how confinement influences stability and reactivity
Source: Royal Society of Chemistry journal article supplement (doi:10.1039/d2cy00829g), 2022-01-01
Supplement: d2cy00829g1.pdf [file d2cy00829g1.pdf]

Electronic Supplementary Information (SI)

## **Hydronium Ion and Water Complexes vs. Methanol on Solid Catalyst Surfaces: How Confinement Influences Stability and Reactivity**

Zheng Li,<sup>[a]</sup> Daniel Dittmann,<sup>[a]</sup> Carolin Rieg,<sup>[a]</sup> Michael Benz,<sup>[a]</sup> and Michael Dyballa<sup>[a]\*</sup>

[a] Institute of Technical Chemistry, University of Stuttgart, Pfaffenwaldring 55, 70569 Stuttgart, Germany

\*Corresponding author, E-mail: michael.dyballa@itc.uni-stuttgart.de

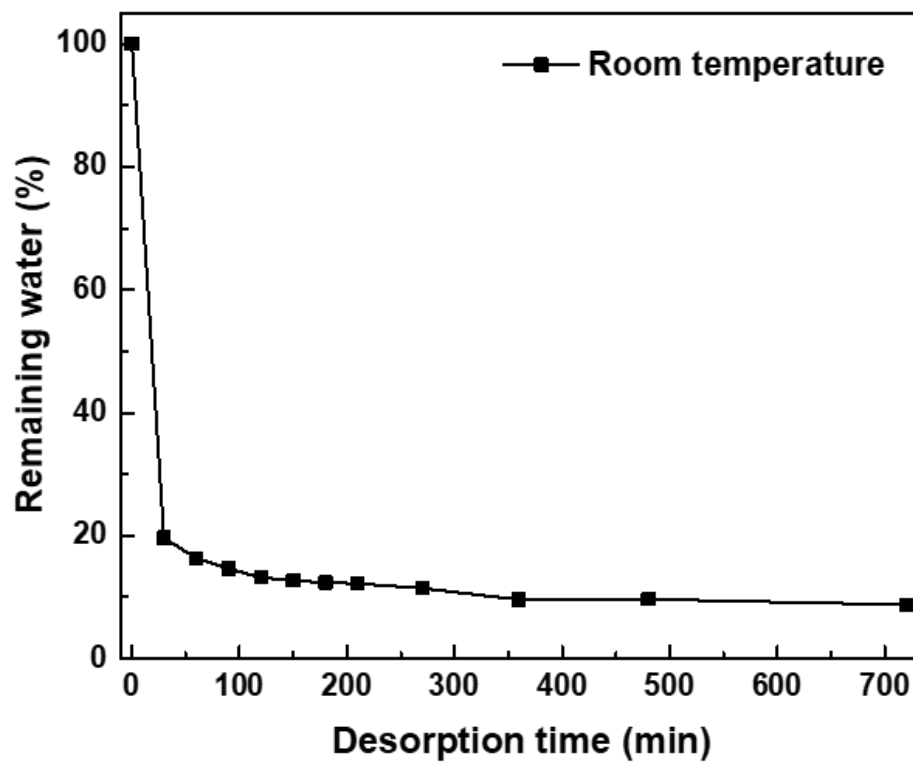

**Figure S1:** Desorption of water from zeolite H-ZSM-5 in vacuum over time at 298 K.

**Table S1:** Data from the physicochemical characterization of the materials under study.

| Material      | Si/Al ratio <sup>a)</sup> | Na <sup>+</sup> density (mmol/g) <sup>a)</sup> | Si(OH) density (mmol/g) <sup>b)</sup> | BAS (H <sup>+</sup> ) density (mmol/g) <sup>b)</sup> | BET surface [m <sup>2</sup> /g] | V <sub>micro</sub> [ml/g] | V <sub>meso</sub> [ml/g] | Pore diameter [nm]  |
|---------------|---------------------------|------------------------------------------------|---------------------------------------|------------------------------------------------------|---------------------------------|---------------------------|--------------------------|---------------------|
| Silicalite    | >800                      | -                                              | 0.66                                  | -                                                    | 350                             | 0.12                      | 0.10                     | <0.56 <sup>d)</sup> |
| Na-ZSM-5      | 24                        | 0.6                                            | 0.08                                  | -                                                    | 345                             | 0.12                      | 0.06                     | <0.56 <sup>d)</sup> |
| H-ZSM-5       | 24                        | -                                              | 0.19                                  | 0.49                                                 | 372                             | 0.13                      | 0.07                     | <0.56 <sup>d)</sup> |
| SBA-15        | >1600                     | -                                              | 2.20                                  | -                                                    | 870                             | 0.14                      | 0.93                     | 7.1 <sup>e)</sup>   |
| Na-[Al]SBA-15 | 12                        | 0.86                                           | 1.14                                  | -                                                    | 522                             | 0.05                      | 0.75                     | 6.7 <sup>e)</sup>   |
| H-[Al]SBA-15  | 12                        | -                                              | 0.59                                  | 0.19                                                 | 442                             | 0.03                      | 0.72                     | 6.8 <sup>e)</sup>   |
| A200          | >1600                     | -                                              | 0.39                                  | -                                                    | 198                             | -                         | 0.76                     | -                   |
| H-STA@A200    | 12 <sup>c)</sup>          | -                                              | 0.57                                  | 0.34                                                 | 120                             | -                         | 0.49                     | -                   |
| Na-STA@A200   | 12 <sup>c)</sup>          | 0.25                                           | 0.52                                  | 0.09                                                 | 123                             | -                         | 0.56                     | -                   |

a) Determined by ICP-OES with experimental accuracy of  $\pm 10\%$ .

b) Determined by <sup>1</sup>H MAS NMR (BAS after NH<sub>3</sub> adsorption).

c) Si/W ratio for STA@A200.

d) according to the IZA database (Baerlocher, C.; McCusker, L. B. Database of Zeolite Structures; <http://www.izastructure.org/databases/>)

e) Calculated from physisorption adsorption branch.

## Water Desorption

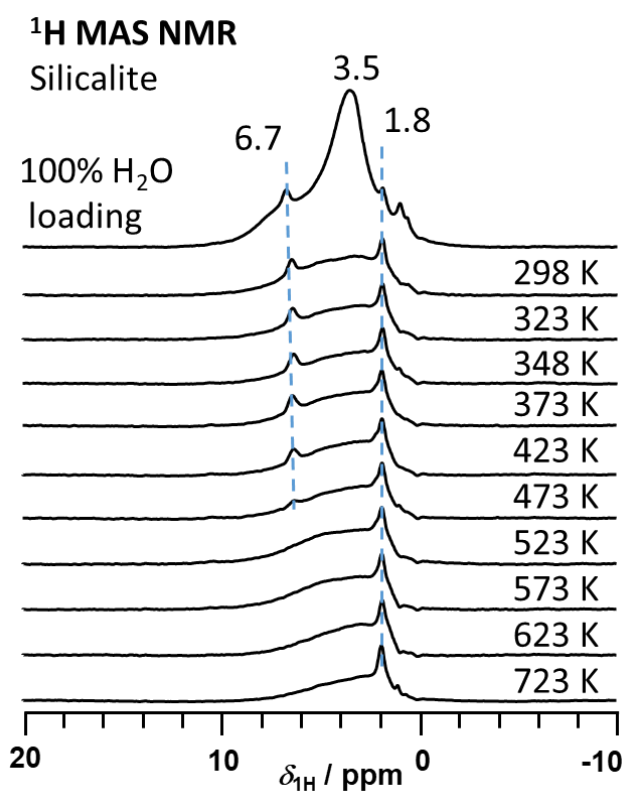

**Figure S2:**  $^1\text{H}$  MAS NMR spectra of the stepwise desorption of  $\text{H}_2\text{O}$  from Silicalite.

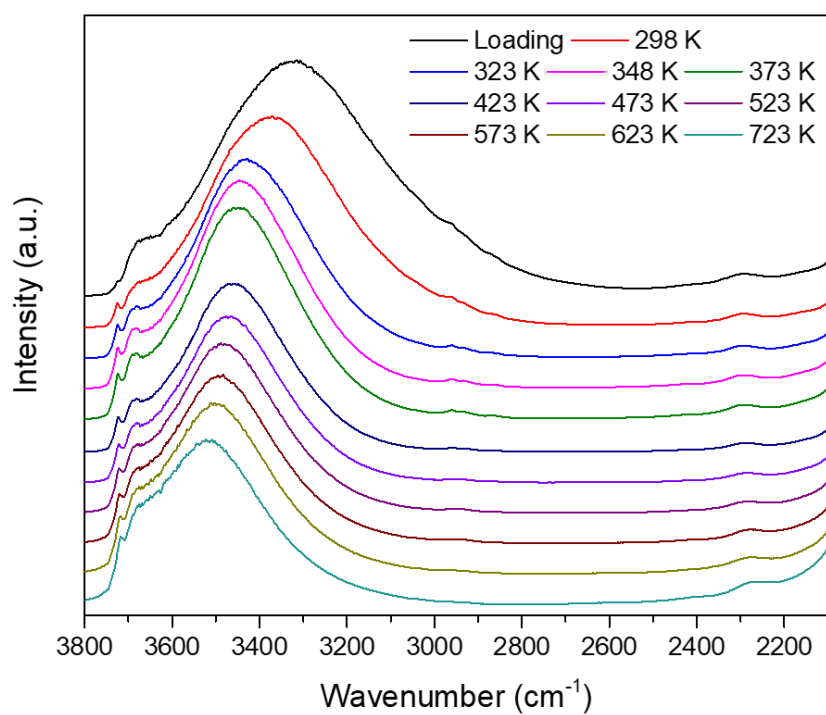

**Figure S3:** DRIFTS spectra of the stepwise desorption of  $\text{H}_2\text{O}$  from Silicalite.

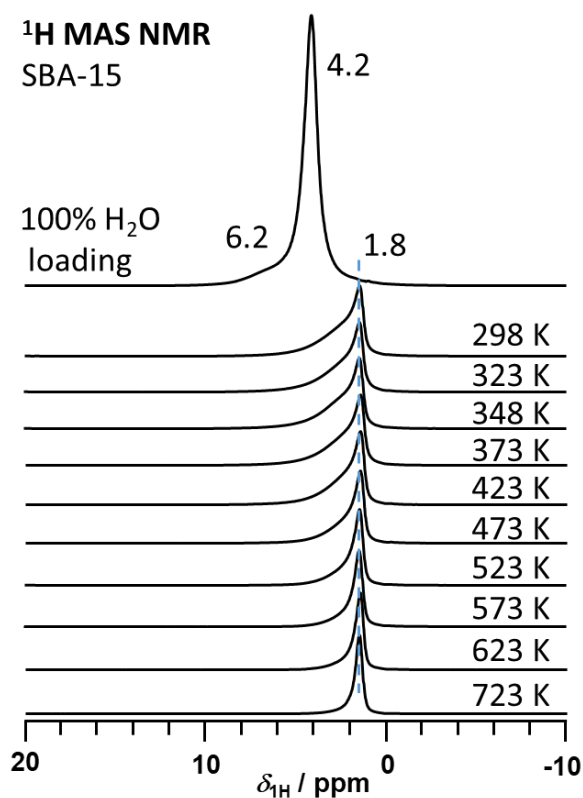

**Figure S4:**  $^1\text{H}$  MAS NMR spectra of the stepwise desorption of  $\text{H}_2\text{O}$  from SBA-15.

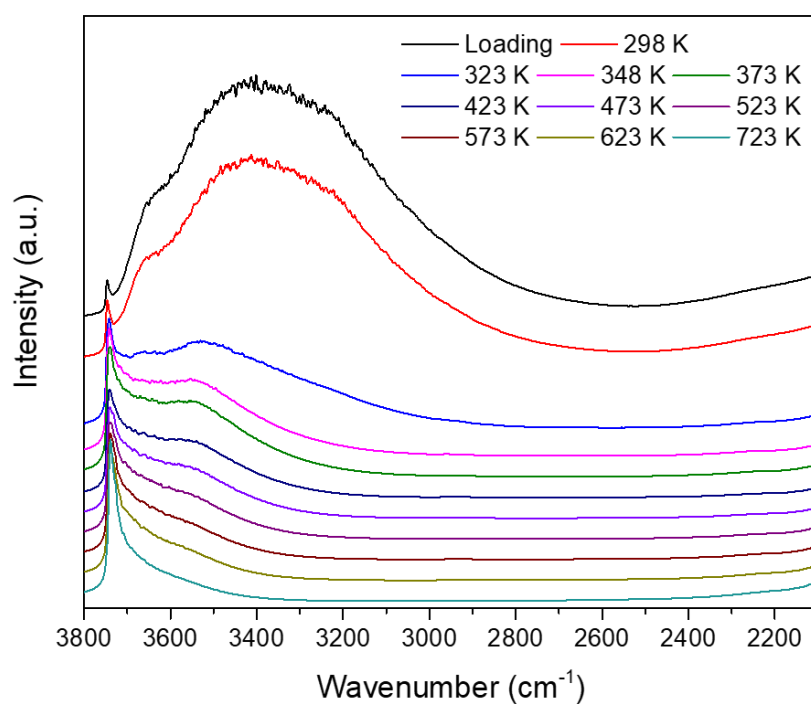

**Figure S5:** DRIFTS spectra of the stepwise desorption of  $\text{H}_2\text{O}$  from SBA-15.

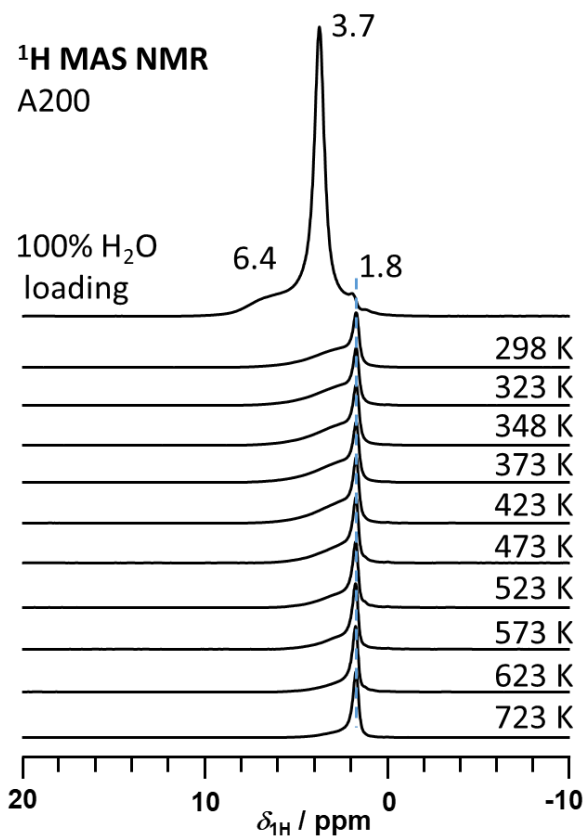

**Figure S6:** <sup>1</sup>H MAS NMR spectra of the stepwise desorption of H<sub>2</sub>O from A200.

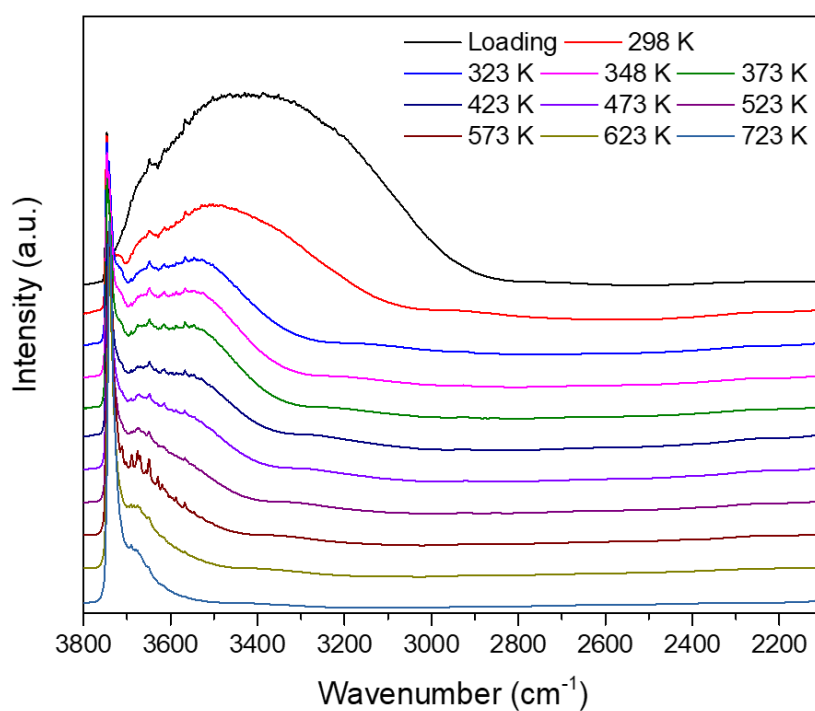

**Figure S7:** DRIFTS spectra of the stepwise desorption of H<sub>2</sub>O from A200.

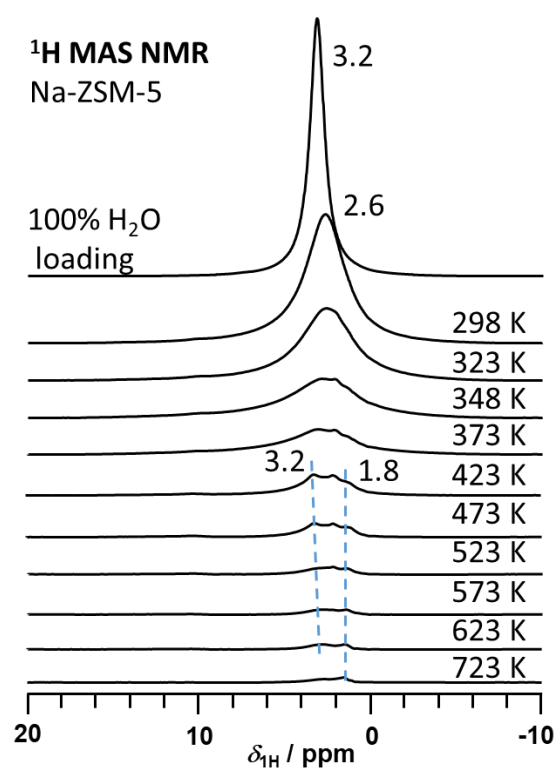

**Figure S8:** <sup>1</sup>H MAS NMR spectra of the stepwise desorption of H<sub>2</sub>O from Na-ZSM-5.

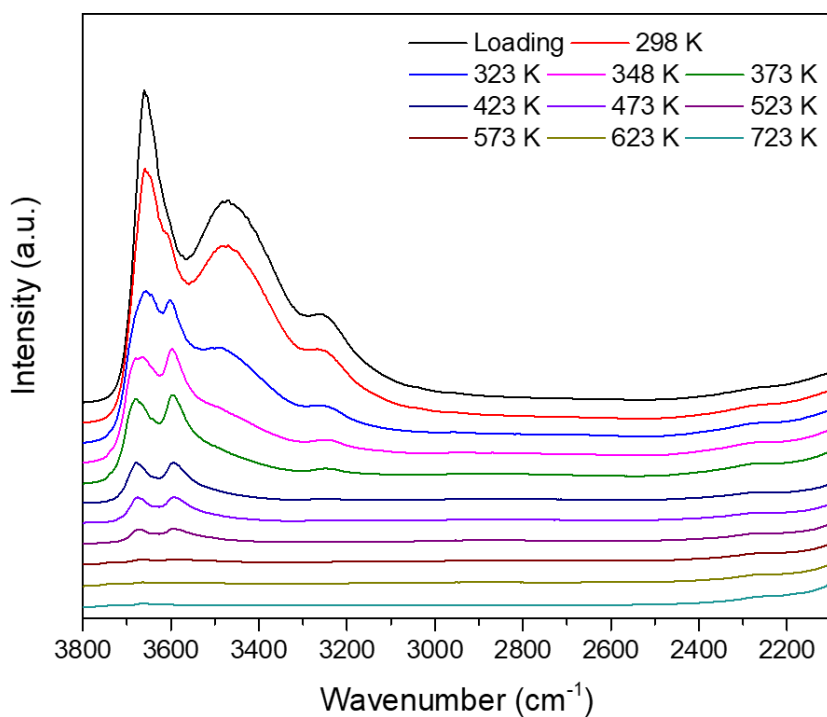

**Figure S9:** DRIFTS spectra of the stepwise desorption of H<sub>2</sub>O from Na-ZSM-5.

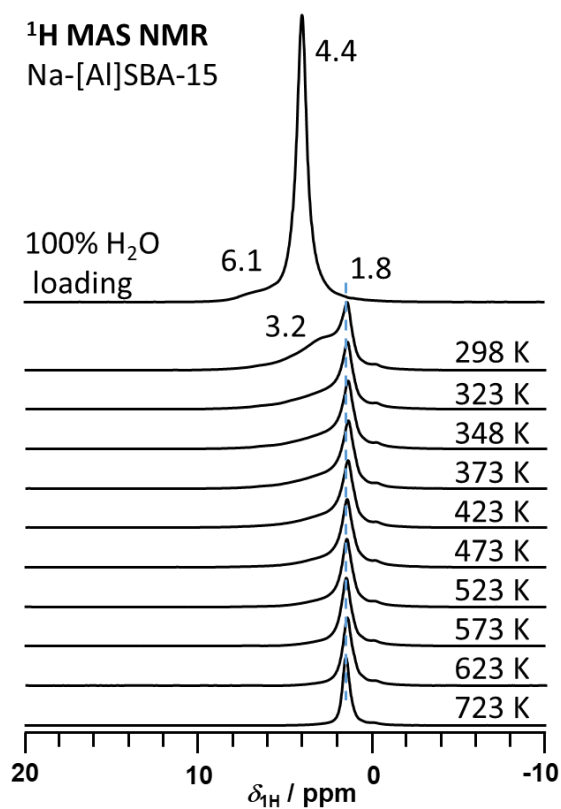

**Figure S10:** <sup>1</sup>H MAS NMR spectra of the stepwise desorption of H<sub>2</sub>O from Na-[Al]SBA-15.

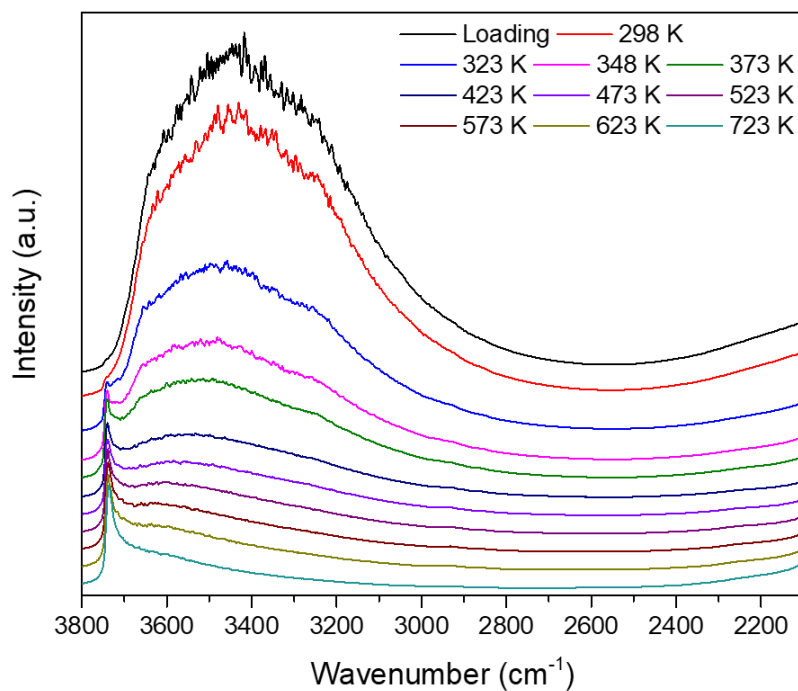

**Figure S11:** DRIFTS spectra of the stepwise desorption of H<sub>2</sub>O from Na-[Al]SBA-15.



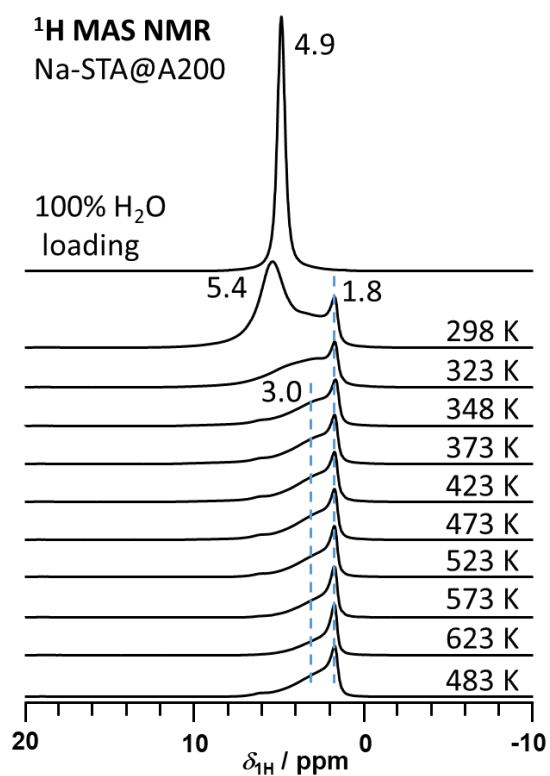

**Figure S12:** <sup>1</sup>H MAS NMR spectra of the stepwise desorption of H<sub>2</sub>O from Na-STA@A200.

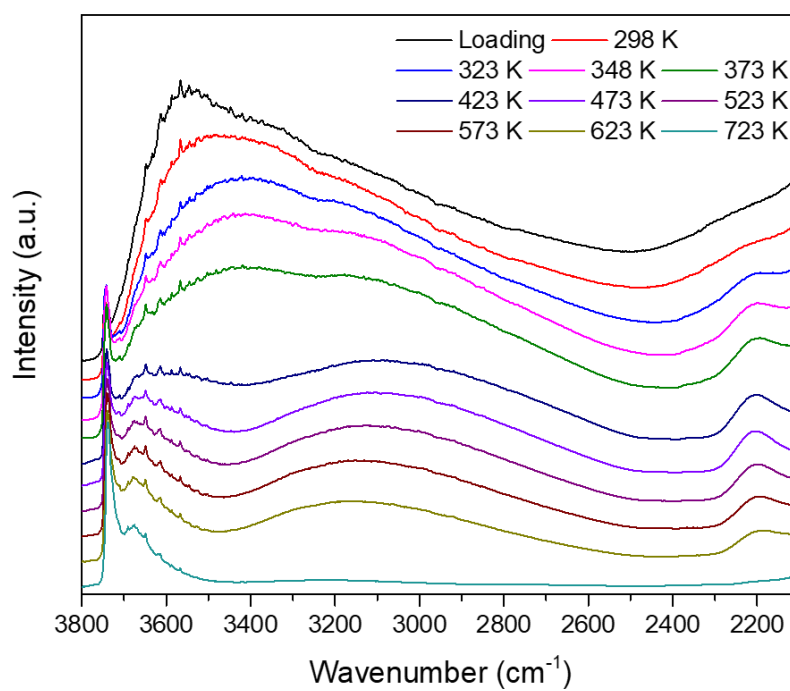

**Figure S13:** DRIFTS spectra of the stepwise desorption of H<sub>2</sub>O from Na-STA@A200.

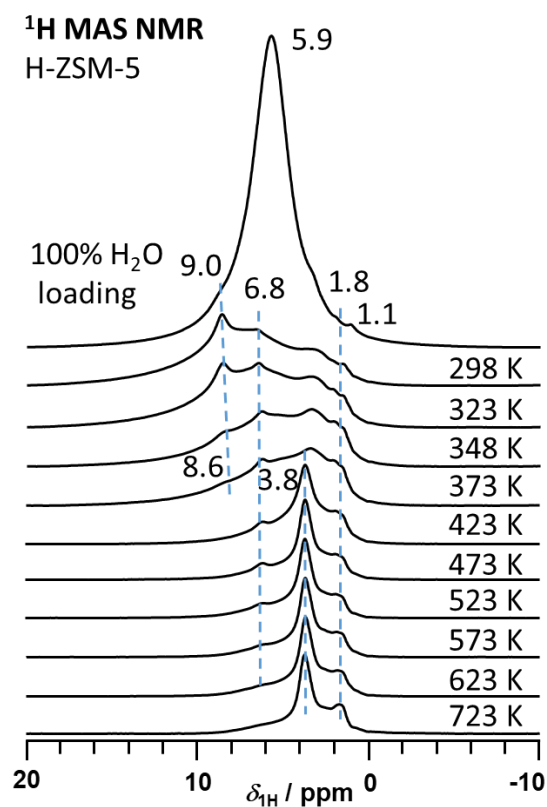

**Figure S14:** <sup>1</sup>H MAS NMR spectra of the stepwise desorption of H<sub>2</sub>O from H-ZSM-5.

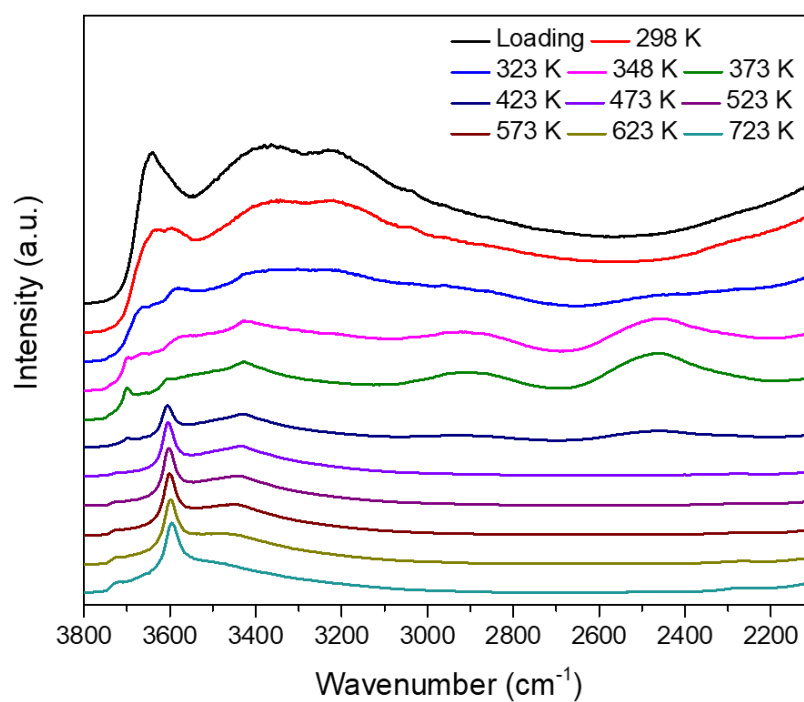

**Figure S15:** DRIFTS spectra of the stepwise desorption of H<sub>2</sub>O from H-ZSM-5.

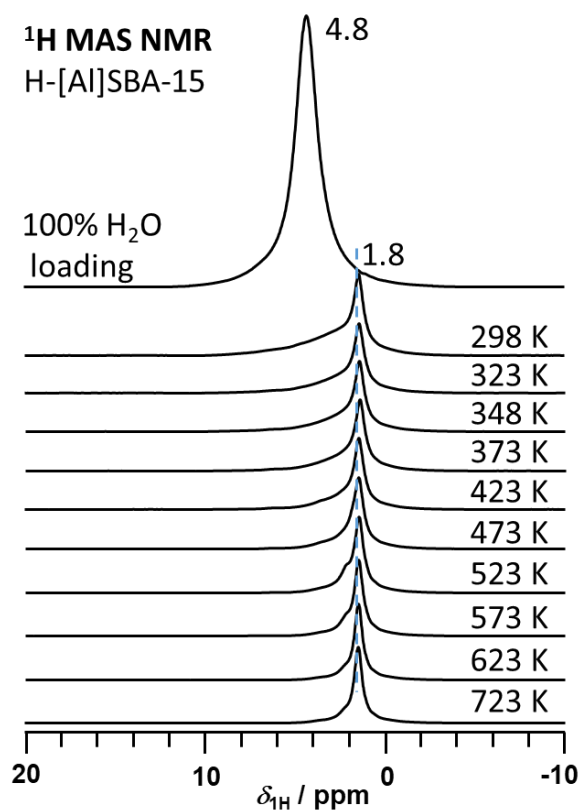

**Figure S16:**  $^1\text{H}$  MAS NMR spectra of the stepwise desorption of  $\text{H}_2\text{O}$  from H-[Al]SBA-15.

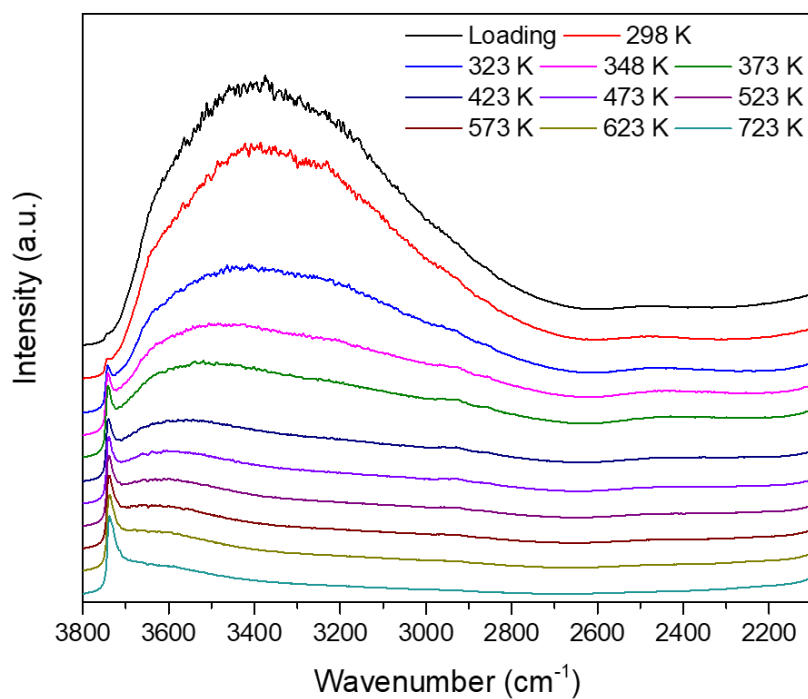

**Figure S17:** DRIFTS spectra of the stepwise desorption of  $\text{H}_2\text{O}$  from H-[Al]SBA-15.

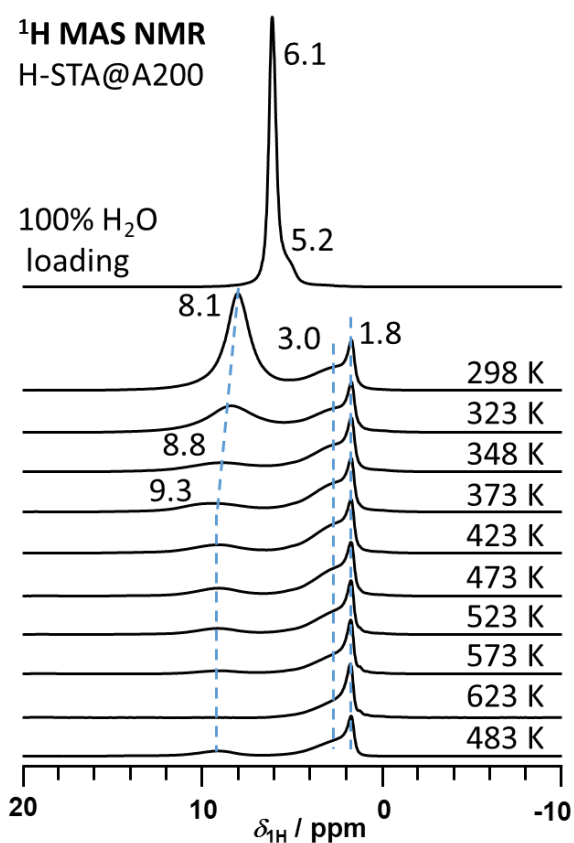

**Figure S18:**  $^1\text{H}$  MAS NMR spectra of the stepwise desorption of  $\text{H}_2\text{O}$  from H-STA@A200.

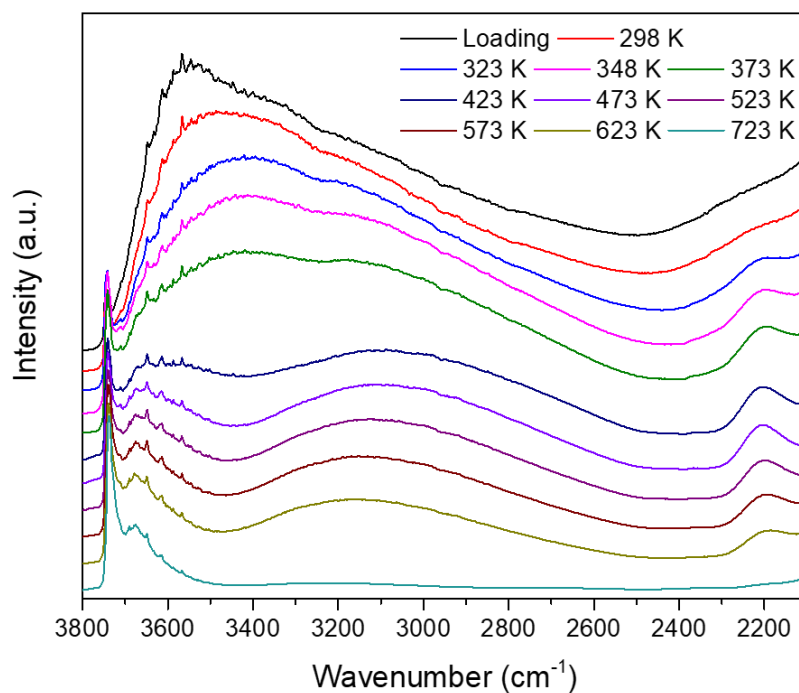

**Figure S19:** DRIFTS spectra of the stepwise desorption of  $\text{H}_2\text{O}$  from H-STA@A200.

**Table S2:** Quantitative evaluation of  $^1\text{H}$  MAS NMR spectra during the stepwise desorption of  $\text{H}_2\text{O}$  from MFI zeolites.

| $\text{H}_2\text{O}@$ | Silicalite |                                    | Na-ZSM-5 |                                  |                                    | H-ZSM-5 |                                 |                                    |                                               |
|-----------------------|------------|------------------------------------|----------|----------------------------------|------------------------------------|---------|---------------------------------|------------------------------------|-----------------------------------------------|
| Temperature           | mmol/g     | $\text{H}_2\text{O}/\text{Si(OH)}$ | mmol/g   | $\text{H}_2\text{O}/\text{Na}^+$ | $\text{H}_2\text{O}/\text{Si(OH)}$ | mmol/g  | $\text{H}_2\text{O}/\text{H}^+$ | $\text{H}_2\text{O}/\text{Si(OH)}$ | $\text{H}_2\text{O}/\text{H}^+\text{+Si(OH)}$ |
| Loading               | 0.54       | 0.8                                | 3.95     | 6.6                              | 50.6                               | 3.78    | 7.7                             | 19.5                               | 5.5                                           |
| 298                   | 0.15       | 0.2                                | 1.12     | 1.9                              | 14.4                               | 0.69    | 1.4                             | 3.6                                | 1.0                                           |
| 323                   | 0.11       | 0.2                                | 0.77     | 1.3                              | 9.9                                | 0.56    | 1.1                             | 2.9                                | 0.8                                           |
| 348                   | 0.07       | 0.1                                | 0.51     | 0.8                              | 6.5                                | 0.38    | 0.8                             | 2.0                                | 0.6                                           |
| 373                   | 0.06       | 0.1                                | 0.35     | 0.6                              | 4.5                                | 0.29    | 0.6                             | 1.5                                | 0.4                                           |
| 423                   | 0.06       | 0.1                                | 0.19     | 0.3                              | 2.4                                | 0.19    | 0.4                             | 1.0                                | 0.3                                           |
| 473                   | 0.05       | 0.1                                | 0.08     | 0.1                              | 1.1                                | 0.18    | 0.4                             | 0.9                                | 0.3                                           |
| 523                   | 0.05       | 0.1                                | 0.02     | <0.1                             | 0.2                                | 0.15    | 0.3                             | 0.8                                | 0.2                                           |
| 573                   | 0.05       | 0.1                                | <0.01    | <0.1                             | 0.1                                | 0.13    | 0.3                             | 0.7                                | 0.2                                           |
| 623                   | <0.01      | <0.1                               | <0.01    | <0.1                             | 0.0                                | 0.11    | 0.2                             | 0.6                                | 0.2                                           |

**Table S3:** Quantitative evaluation of  $^1\text{H}$  MAS NMR spectra during the stepwise desorption of  $\text{H}_2\text{O}$  from SBA-15 materials.

| $\text{H}_2\text{O} @$ | SBA-15 |                                    | Na-[Al]SBA-15 |                                  |                                    | H-[Al]SBA-15 |                                 |                                    |                                               |
|------------------------|--------|------------------------------------|---------------|----------------------------------|------------------------------------|--------------|---------------------------------|------------------------------------|-----------------------------------------------|
| Temperature            | mmol/g | $\text{H}_2\text{O}/\text{Si(OH)}$ | mmol/g        | $\text{H}_2\text{O}/\text{Na}^+$ | $\text{H}_2\text{O}/\text{Si(OH)}$ | mmol/g       | $\text{H}_2\text{O}/\text{H}^+$ | $\text{H}_2\text{O}/\text{Si(OH)}$ | $\text{H}_2\text{O}/\text{H}^+\text{+Si(OH)}$ |
| loading                | 8.98   | 4.1                                | 7.33          | 8.5                              | 6.4                                | 6.18         | 32.5                            | 10.4                               | 7.9                                           |
| 298                    | 1.38   | 0.6                                | 1.16          | 1.3                              | 1.0                                | 0.94         | 4.9                             | 1.6                                | 1.2                                           |
| 323                    | 1.35   | 0.6                                | 0.78          | 0.9                              | 0.7                                | 0.82         | 4.3                             | 1.4                                | 1.1                                           |
| 348                    | 1.28   | 0.6                                | 0.73          | 0.8                              | 0.6                                | 0.81         | 4.3                             | 1.4                                | 1.0                                           |
| 373                    | 1.27   | 0.6                                | 0.70          | 0.8                              | 0.6                                | 0.77         | 4.0                             | 1.3                                | 1.0                                           |
| 423                    | 1.21   | 0.6                                | 0.50          | 0.6                              | 0.4                                | 0.67         | 3.5                             | 1.1                                | 0.9                                           |
| 473                    | 0.83   | 0.4                                | 0.29          | 0.3                              | 0.3                                | 0.67         | 3.5                             | 1.1                                | 0.9                                           |
| 523                    | 0.50   | 0.2                                | 0.21          | 0.2                              | 0.2                                | 0.60         | 3.1                             | 1.0                                | 0.8                                           |
| 573                    | 0.24   | 0.1                                | 0.17          | 0.2                              | 0.1                                | 0.50         | 2.6                             | 0.8                                | 0.6                                           |
| 623                    | 0.19   | 0.1                                | 0.01          | <0.1                             | 0.0                                | 0.39         | 2.0                             | 0.7                                | 0.5                                           |

**Table S4:** Quantitative evaluation of  $^1\text{H}$  MAS NMR spectra during the stepwise desorption of  $\text{H}_2\text{O}$  from STA materials.

| $\text{H}_2\text{O}$ @ | A200   |                                    | Na-STA@A200 |                                  |                                    | H-STA@A200 |                                 |                                    |                                               |
|------------------------|--------|------------------------------------|-------------|----------------------------------|------------------------------------|------------|---------------------------------|------------------------------------|-----------------------------------------------|
| Temperature            | mmol/g | $\text{H}_2\text{O}/\text{Si(OH)}$ | mmol/g      | $\text{H}_2\text{O}/\text{Na}^+$ | $\text{H}_2\text{O}/\text{Si(OH)}$ | mmol/g     | $\text{H}_2\text{O}/\text{H}^+$ | $\text{H}_2\text{O}/\text{Si(OH)}$ | $\text{H}_2\text{O}/\text{H}^+\text{+Si(OH)}$ |
| loading                | 0.92   | 2.4                                | 2.90        | 11.6                             | 4.8                                | 3.48       | 10.2                            | 6.1                                | 3.8                                           |
| 298                    | 0.32   | 0.8                                | 0.81        | 3.2                              | 1.3                                | 0.60       | 1.8                             | 1.1                                | 0.7                                           |
| 323                    | 0.26   | 0.7                                | 0.37        | 1.5                              | 0.6                                | 0.27       | 0.8                             | 0.5                                | 0.3                                           |
| 348                    | 0.22   | 0.6                                | 0.24        | 1.0                              | 0.4                                | 0.13       | 0.4                             | 0.2                                | 0.1                                           |
| 373                    | 0.20   | 0.5                                | 0.21        | 0.9                              | 0.3                                | 0.13       | 0.4                             | 0.2                                | 0.1                                           |
| 423                    | 0.20   | 0.5                                | 0.19        | 0.8                              | 0.3                                | 0.09       | 0.3                             | 0.2                                | 0.1                                           |
| 473                    | 0.14   | 0.4                                | 0.16        | 0.6                              | 0.3                                | <0.01      | <0.1                            | 0.0                                | 0.0                                           |
| 523                    | 0.14   | 0.4                                | 0.08        | 0.3                              | 0.1                                | 0.0        | 0.0                             | 0.0                                | 0.0                                           |
| 573                    | 0.10   | 0.2                                | 0.02        | 0.1                              | 0.0                                | 0.0        | 0.0                             | 0.0                                | 0.0                                           |
| 623                    | 0.08   | 0.2                                | <0.01       | 0.0                              | 0.0                                | 0.0        | 0.0                             | 0.0                                | 0.0                                           |
